# Supplementary material
Source: Research Square preprint supplement (doi:10.21203/rs.3.rs-9921548/v1)
Supplement: Supplementary file 1 [file 7a29b5ae18bfcb724213330e.docx]

**Supporting Information for**

**Efficient H2O2 Synthesis from Seawater via Na,Pb-codoped SnSe under a Small Temperature Gradient**

Yuyan Xu,1 Xinyue Zhang,1,2 Yangyang Wan,3* Bingchao Qin,4 Jun Pei,5 Hong Liu,1 Xiaoxue Song,1 Shutong Jiang,1 Yuqiao Zhang,1 Long Zhang,1 Yong Liu,2 Qian Yu,6 Li-Dong Zhao,4* Shun Li,1* and Jianming Zhang1*

1 School of Chemistry and Chemical Engineering, Jiangsu University, Zhenjiang, Jiangsu 212013 China

2 Foshan (Southern China) Institute for New Materials, Foshan 528231, China

3 Institute for Advanced Materials, School of Materials Science and Engineering, Jiangsu University, Zhenjiang, Jiangsu 212013 China

4 School of Materials Science and Engineering, Beihang University, Beijing 100191, China

5 Beijing Municipal Key Laboratory of New Energy Materials and Technologies, School of Materials Science and Engineering, University of Science and Technology Beijing, Beijing 100083, China

6 School of Life Sciences, Jiangsu University, Zhenjiang, Jiangsu 212013 China

*Corresponding author emails: yangyang.wan@ujs.edu.cn; zhaolidong@buaa.edu.cn; shun@ujs.edu.cn; zhangjm@ujs.edu.cn

**Supplemental Figures**


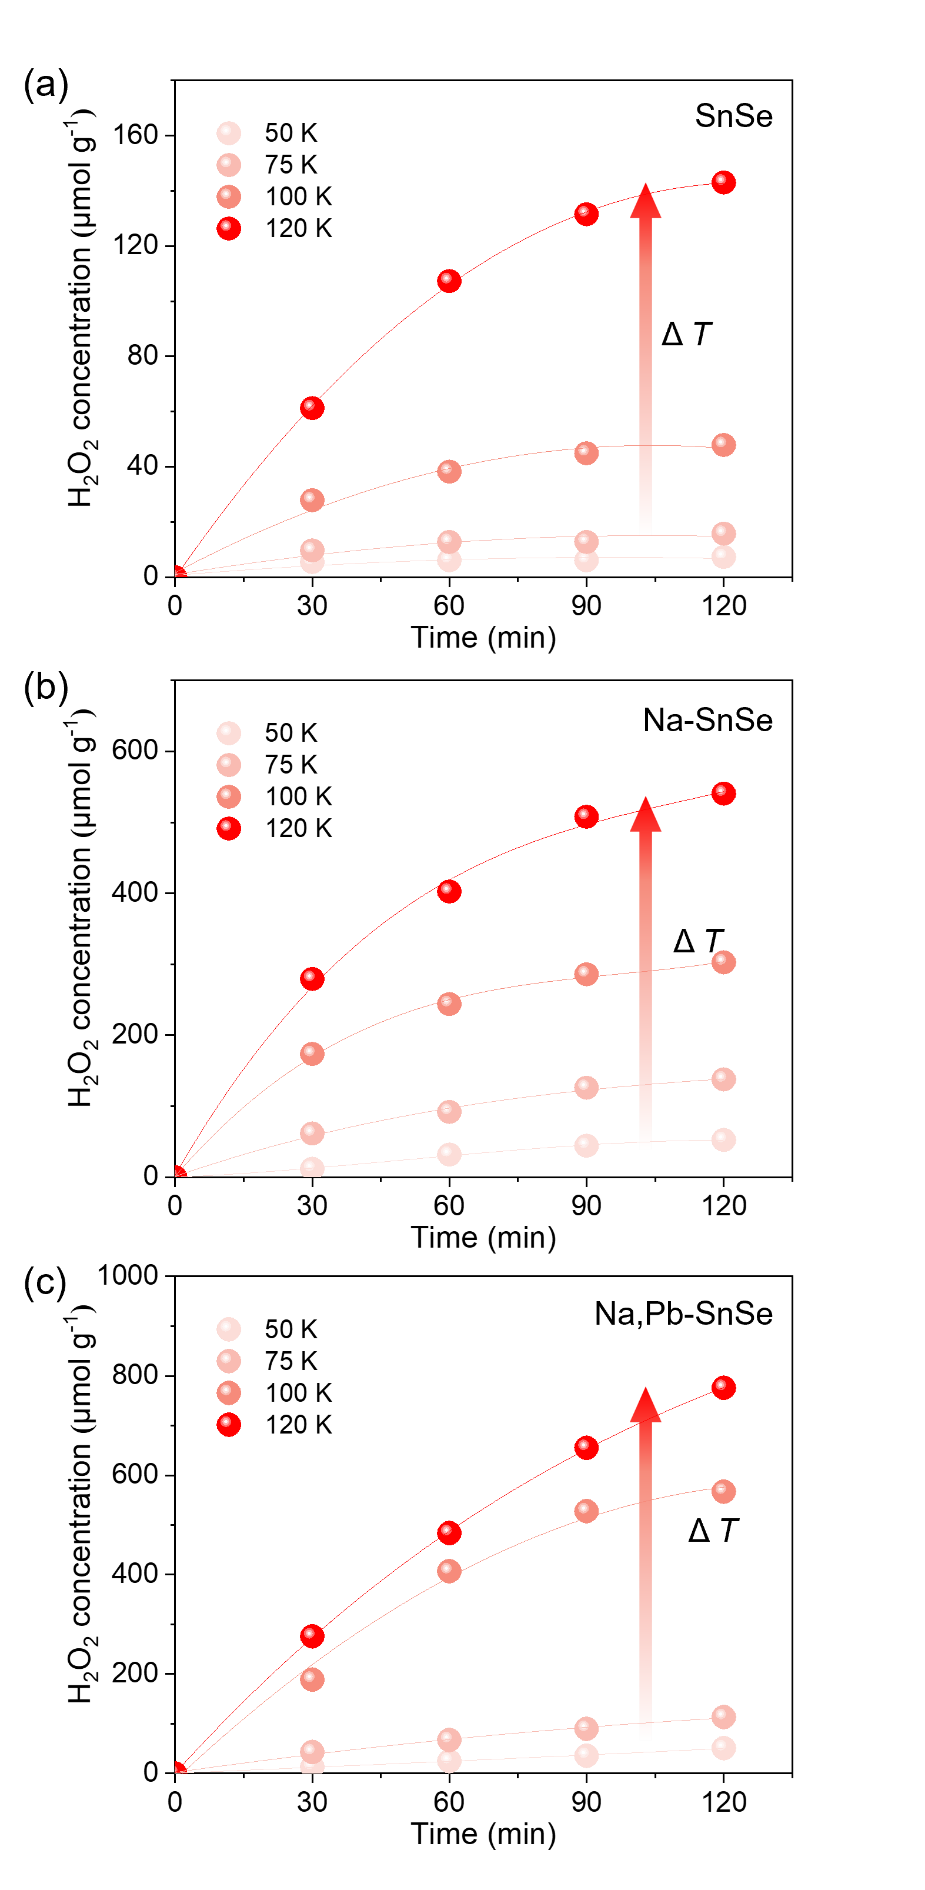


**Supplementary Fig. 1.** TEC H2O2 generation in 2 h under different Δ*T* using SnSe (a), Na-SnSe (b) and Na,Pb-SnSe (c) nanocatalysts in O2-saturated DI water.


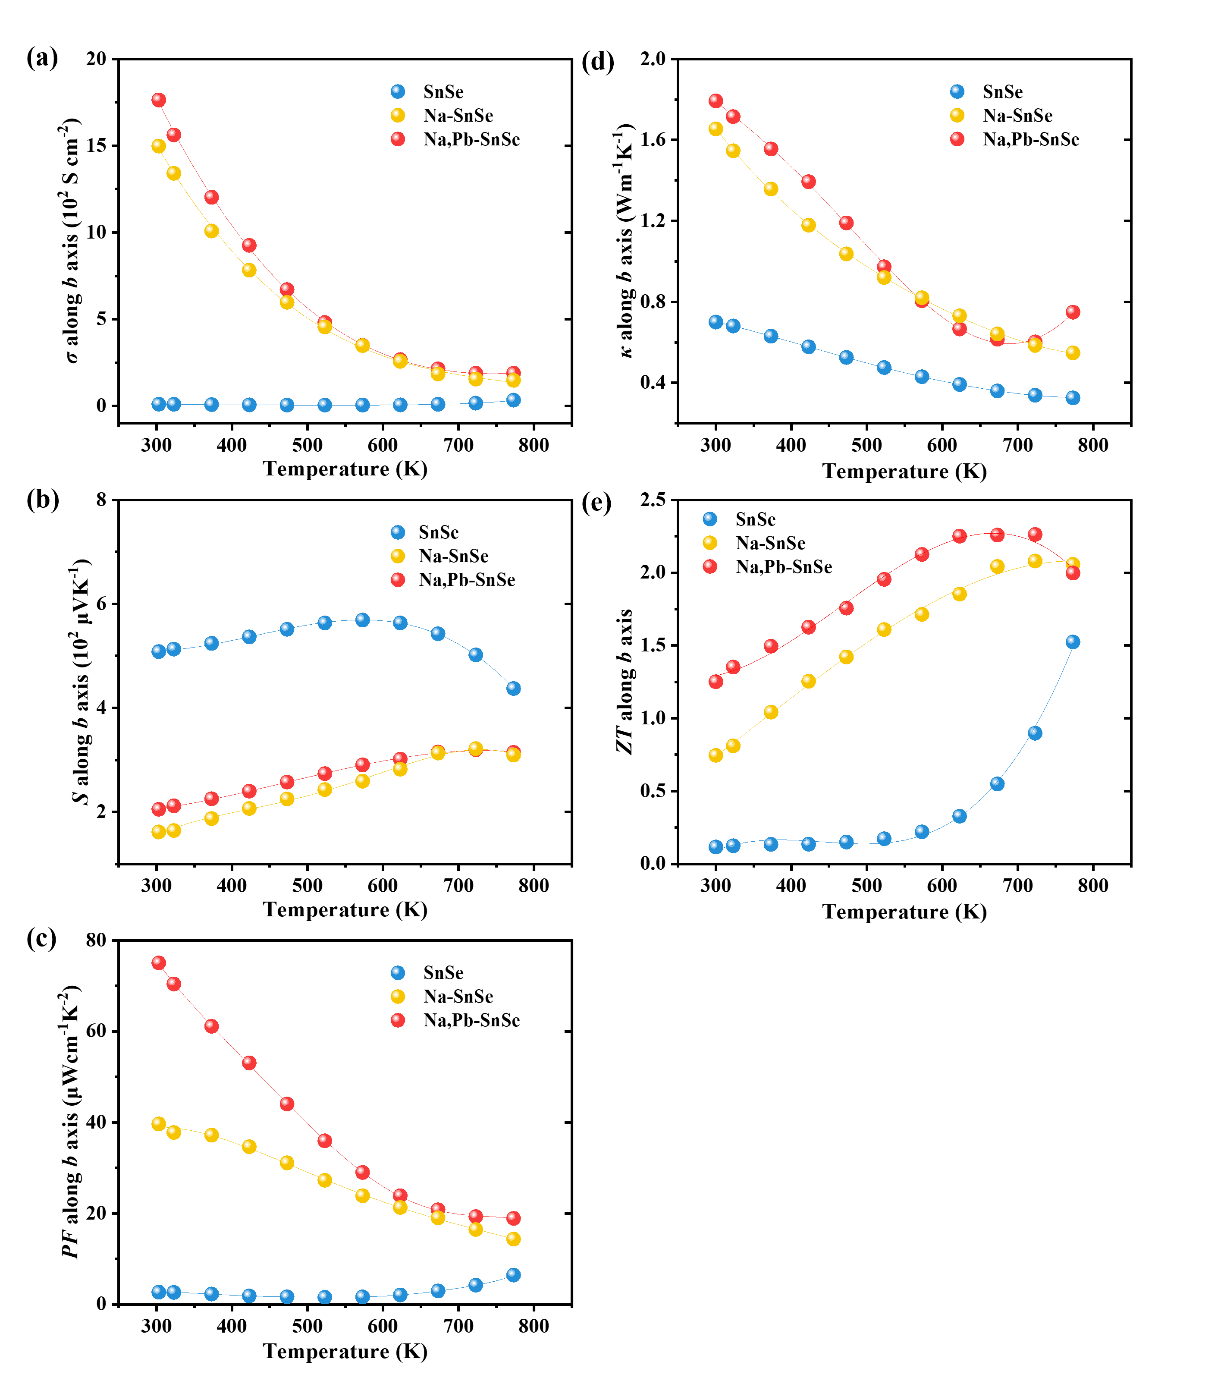


**Supplementary Fig. 2.** Thermoelectric properties as a function of temperature for SnSe, Na-SnSe and Na,Pb-SnSe crystals along the *b* axis: (a) electrical conductivity, (b) Seebeck coefficient, (c) power factor (*PF*), (d) total thermal conductivity, and (e) *ZT* values. The data were taken from Refs. S1-S3.

At low temperature range (300–400 K), Na-SnSe and Na,Pb-SnSe exhibited much higher electrical conductivity than pristine SnSe bulk crystal (**Supplementary Fig. 2a**), which are beneficial to supply charge carriers under a small temperature gradient. The Na,Pb-SnSe sample exhibited the highest power factor (*PF*)value (**Supplementary Fig. 2c**), calculated from Seebeck coefficient (**Supplementary Fig. 2b**). The thermal conductivity for both Na-SnSe and Na,Pb-SnSe is largely greater than that of SnSe (**Supplementary Fig. 2d**). The calculated *ZT* values of the three bulk samples along *b* axis are presented in **Supplementary Fig. 2e**.


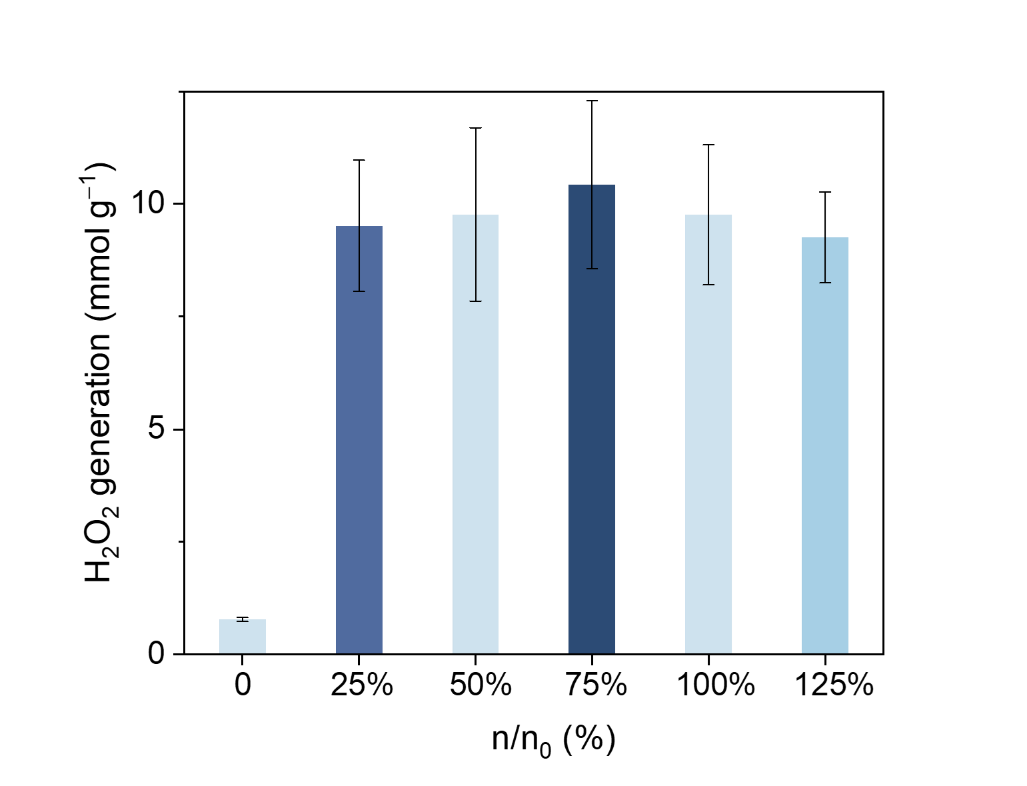


**Supplementary Fig. 3**. TEC reactions conducted across varying artificial seawater concentration. *n*0 is the concentration of the suggested standard artificial seawater, and *n* is the concentration of diluted or concentrated artificial seawater.


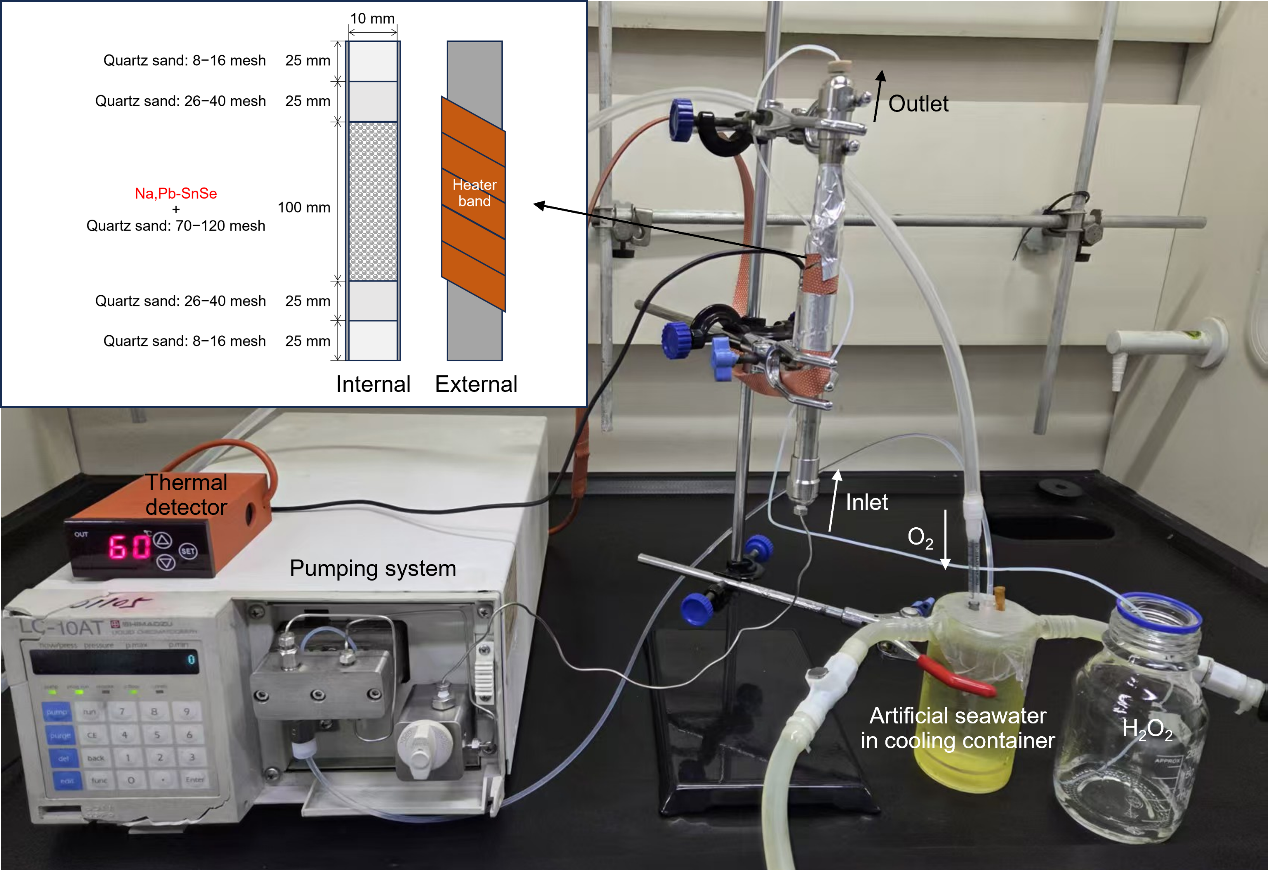


**Supplementary Fig. 4**. Photograph of the continuous-flow TEC reactor and schematic of the commercial stainless-steel reaction column with the internal packing structure.


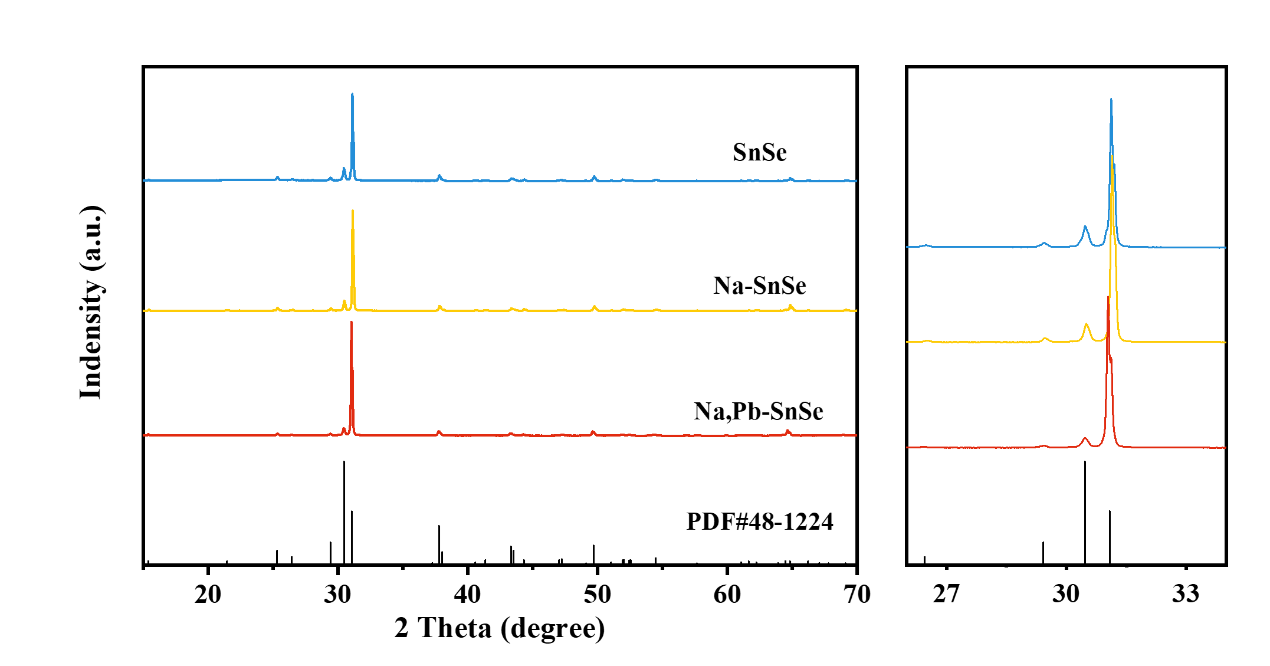


**Supplementary Fig. 5.** XRD patterns of powdered SnSe, Na-SnSe and Na,Pb-SnSe samples. Standard PDF card No. 48-1224 of orthorhombic *Pnma* phase of SnSe is also shown for comparison.


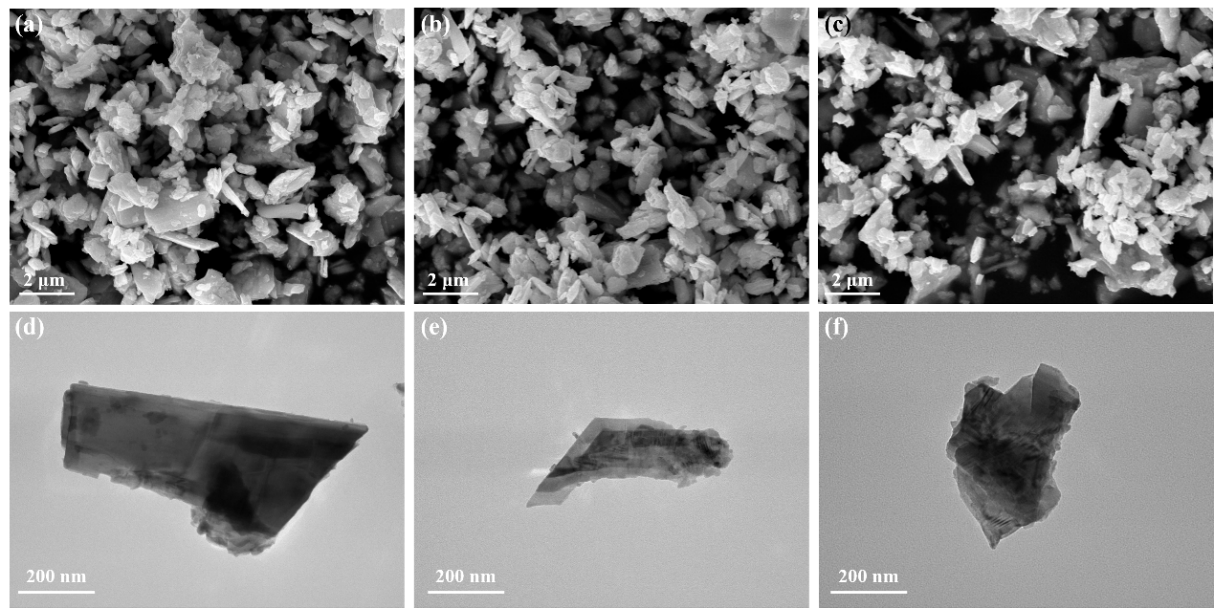


**Supplementary Fig. 6.** SEM images of exfoliated powdered nanocatalysts from bulk crystals: (a) SnSe, (b) Na-SnSe and (c) Na,Pb-SnSe. Corresponding TEM images of (d) SnSe, (e) Na-SnSe and (f) Na,Pb-SnSe.


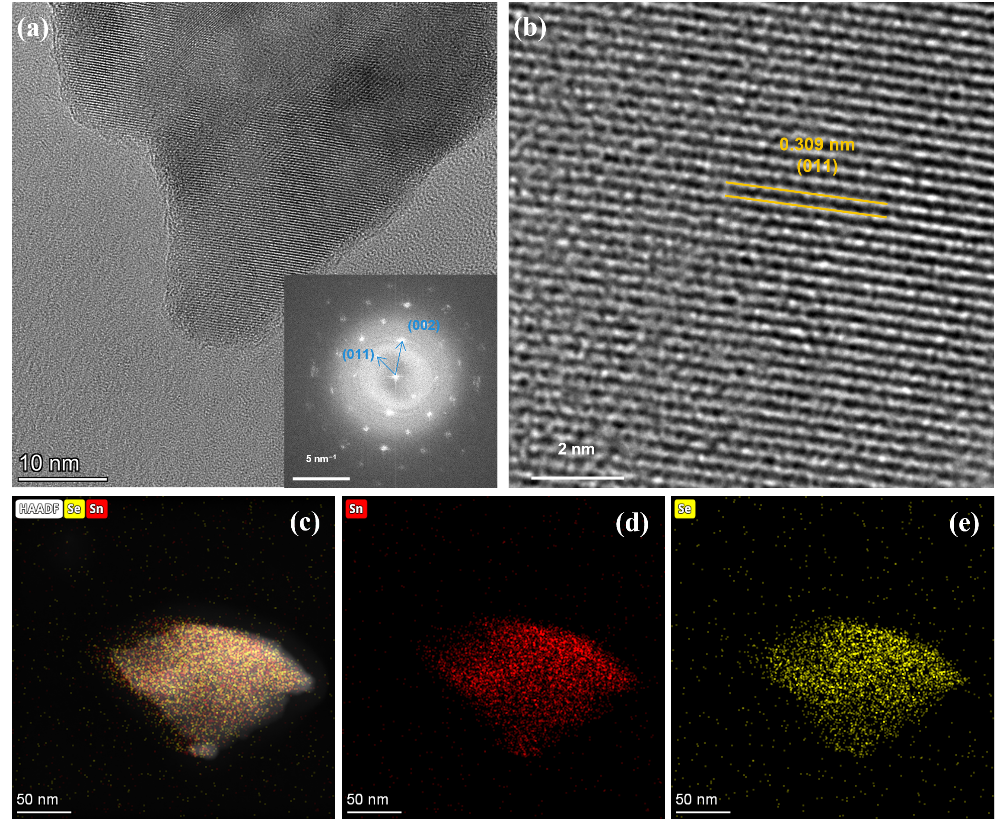


**Supplementary Fig. 7**. (a, b) HRTEM images (inset of a shows SAED patterns) and (c-e) EDS mappings of exfoliated SnSe nanosheets from bulk crystal.


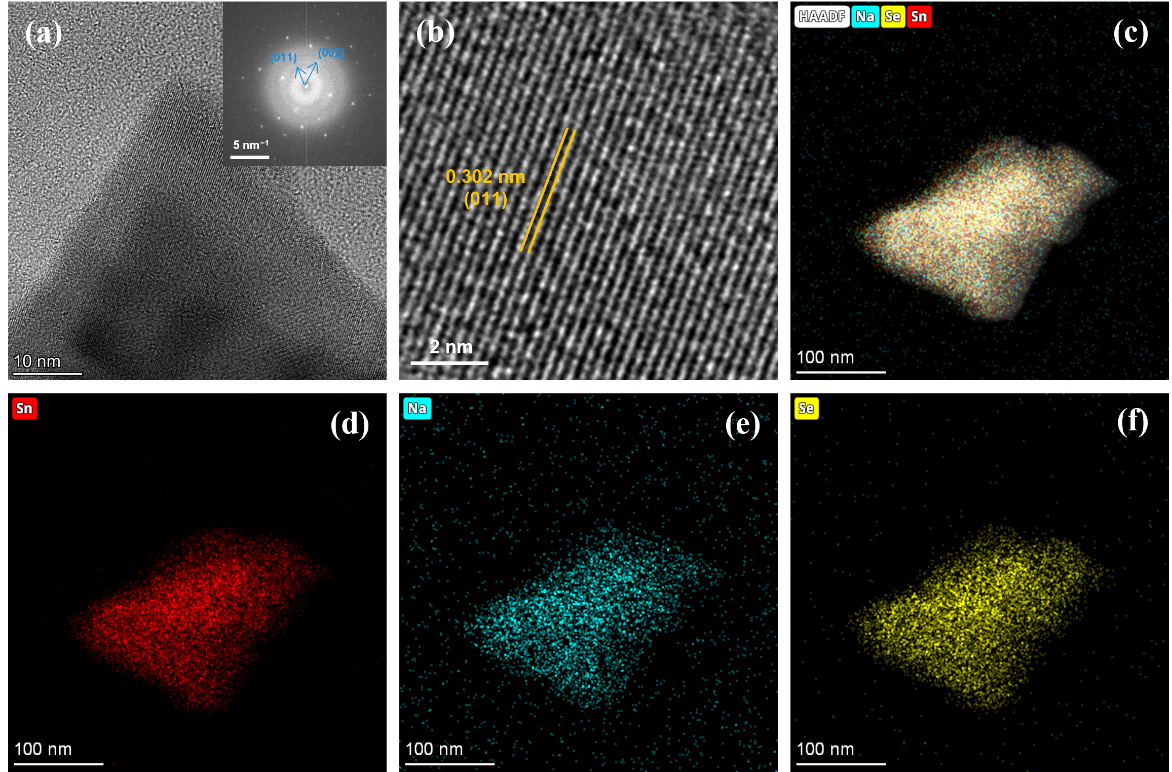


**Supplementary Fig. 8**. (a, b) HRTEM images (inset of a shows SAED patterns) and (c-f) EDS mappings of exfoliated Na-SnSe nanosheets from bulk crystal.


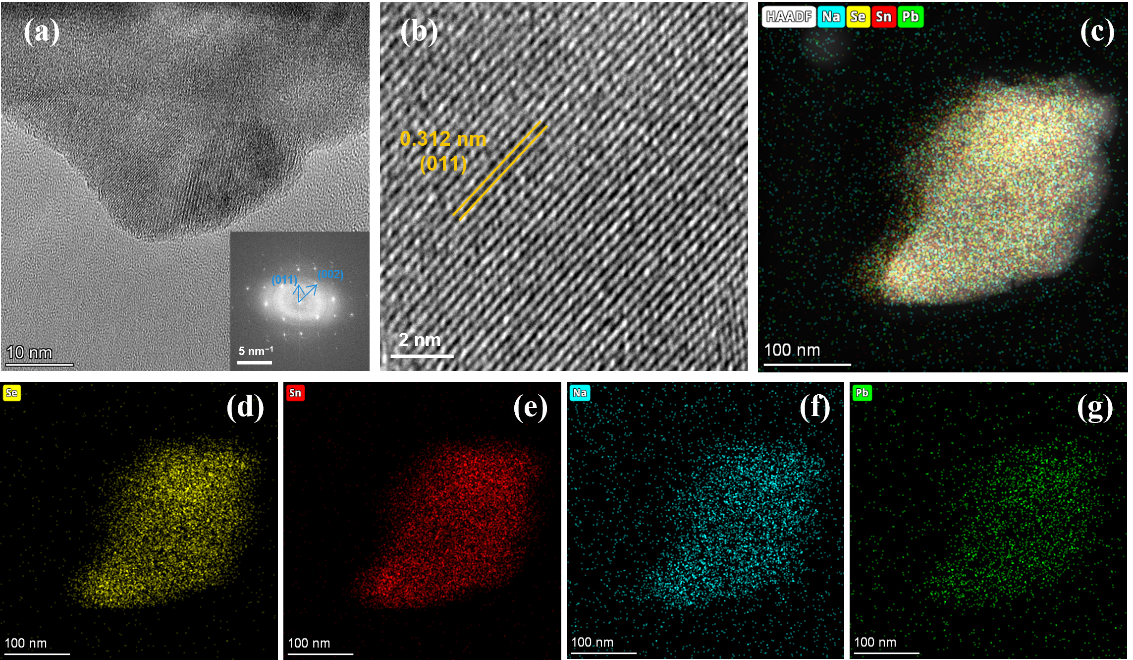


**Supplementary Fig. 9**. (a, b) HRTEM images (inset of a shows SAED patterns) and (c-g) EDS mappings of exfoliated Na,Pb-SnSe nanosheets from bulk crystal.


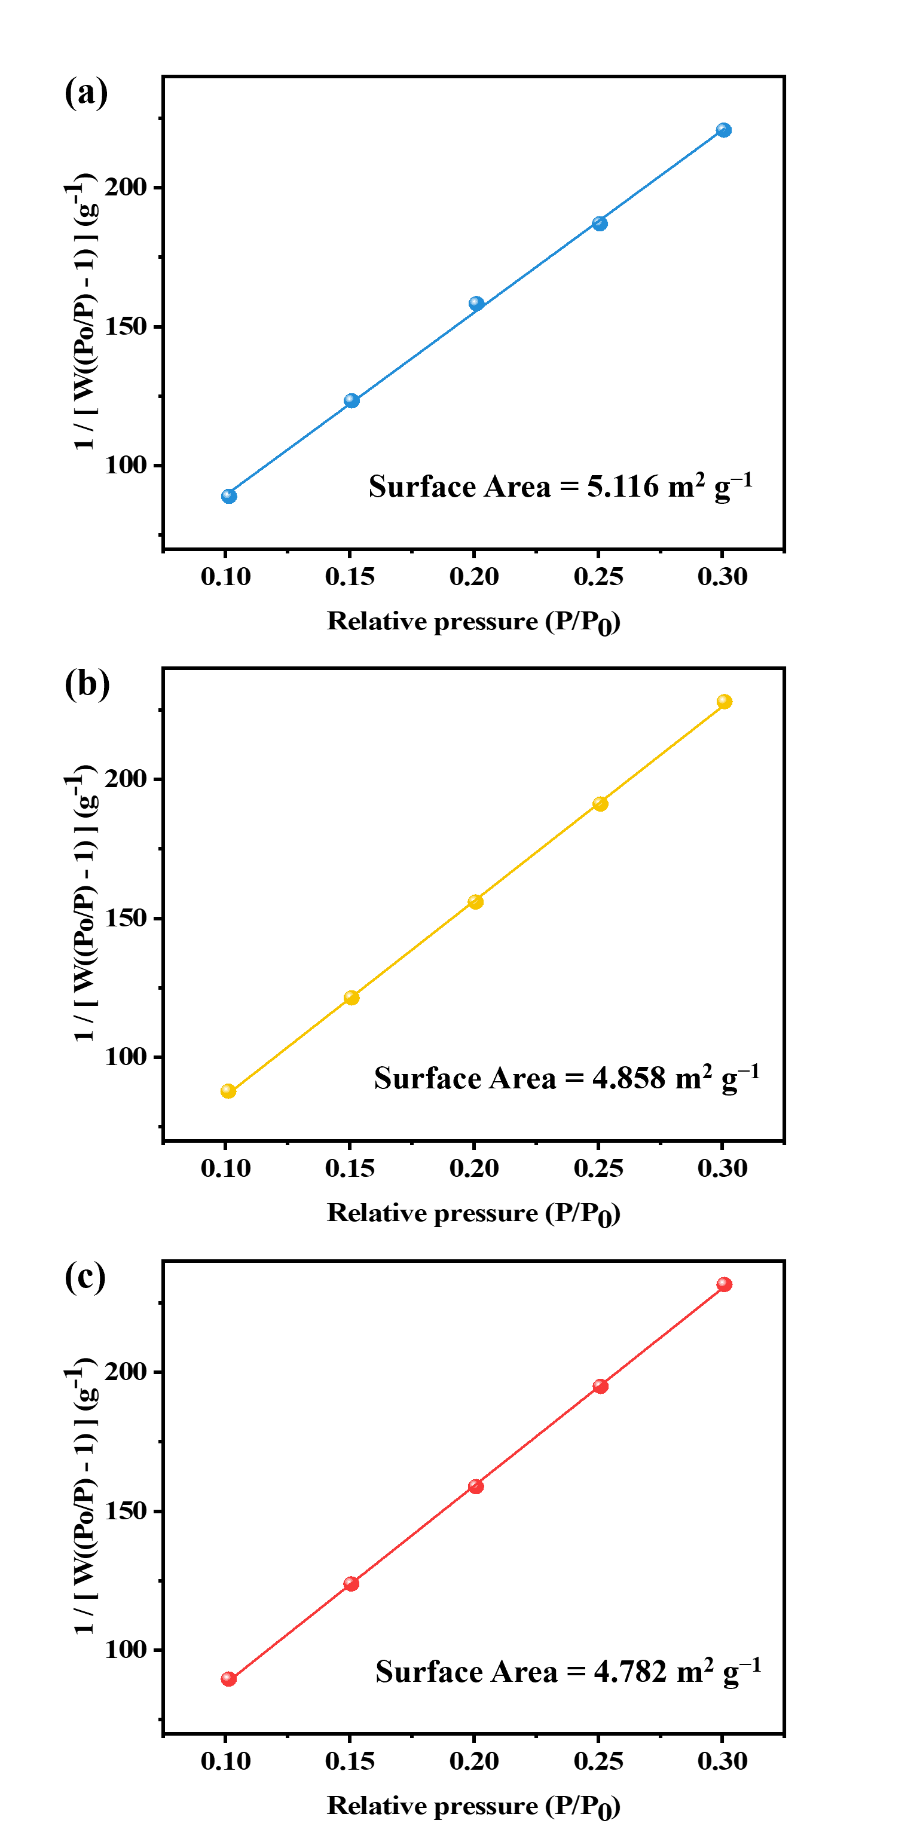


**Supplementary Fig. 10**. Specific surface area analysis of (a) SnSe, (b) Na-SnSe and (c) Na,Pb-SnSe nanosheets exfoliated from bulk crystals.


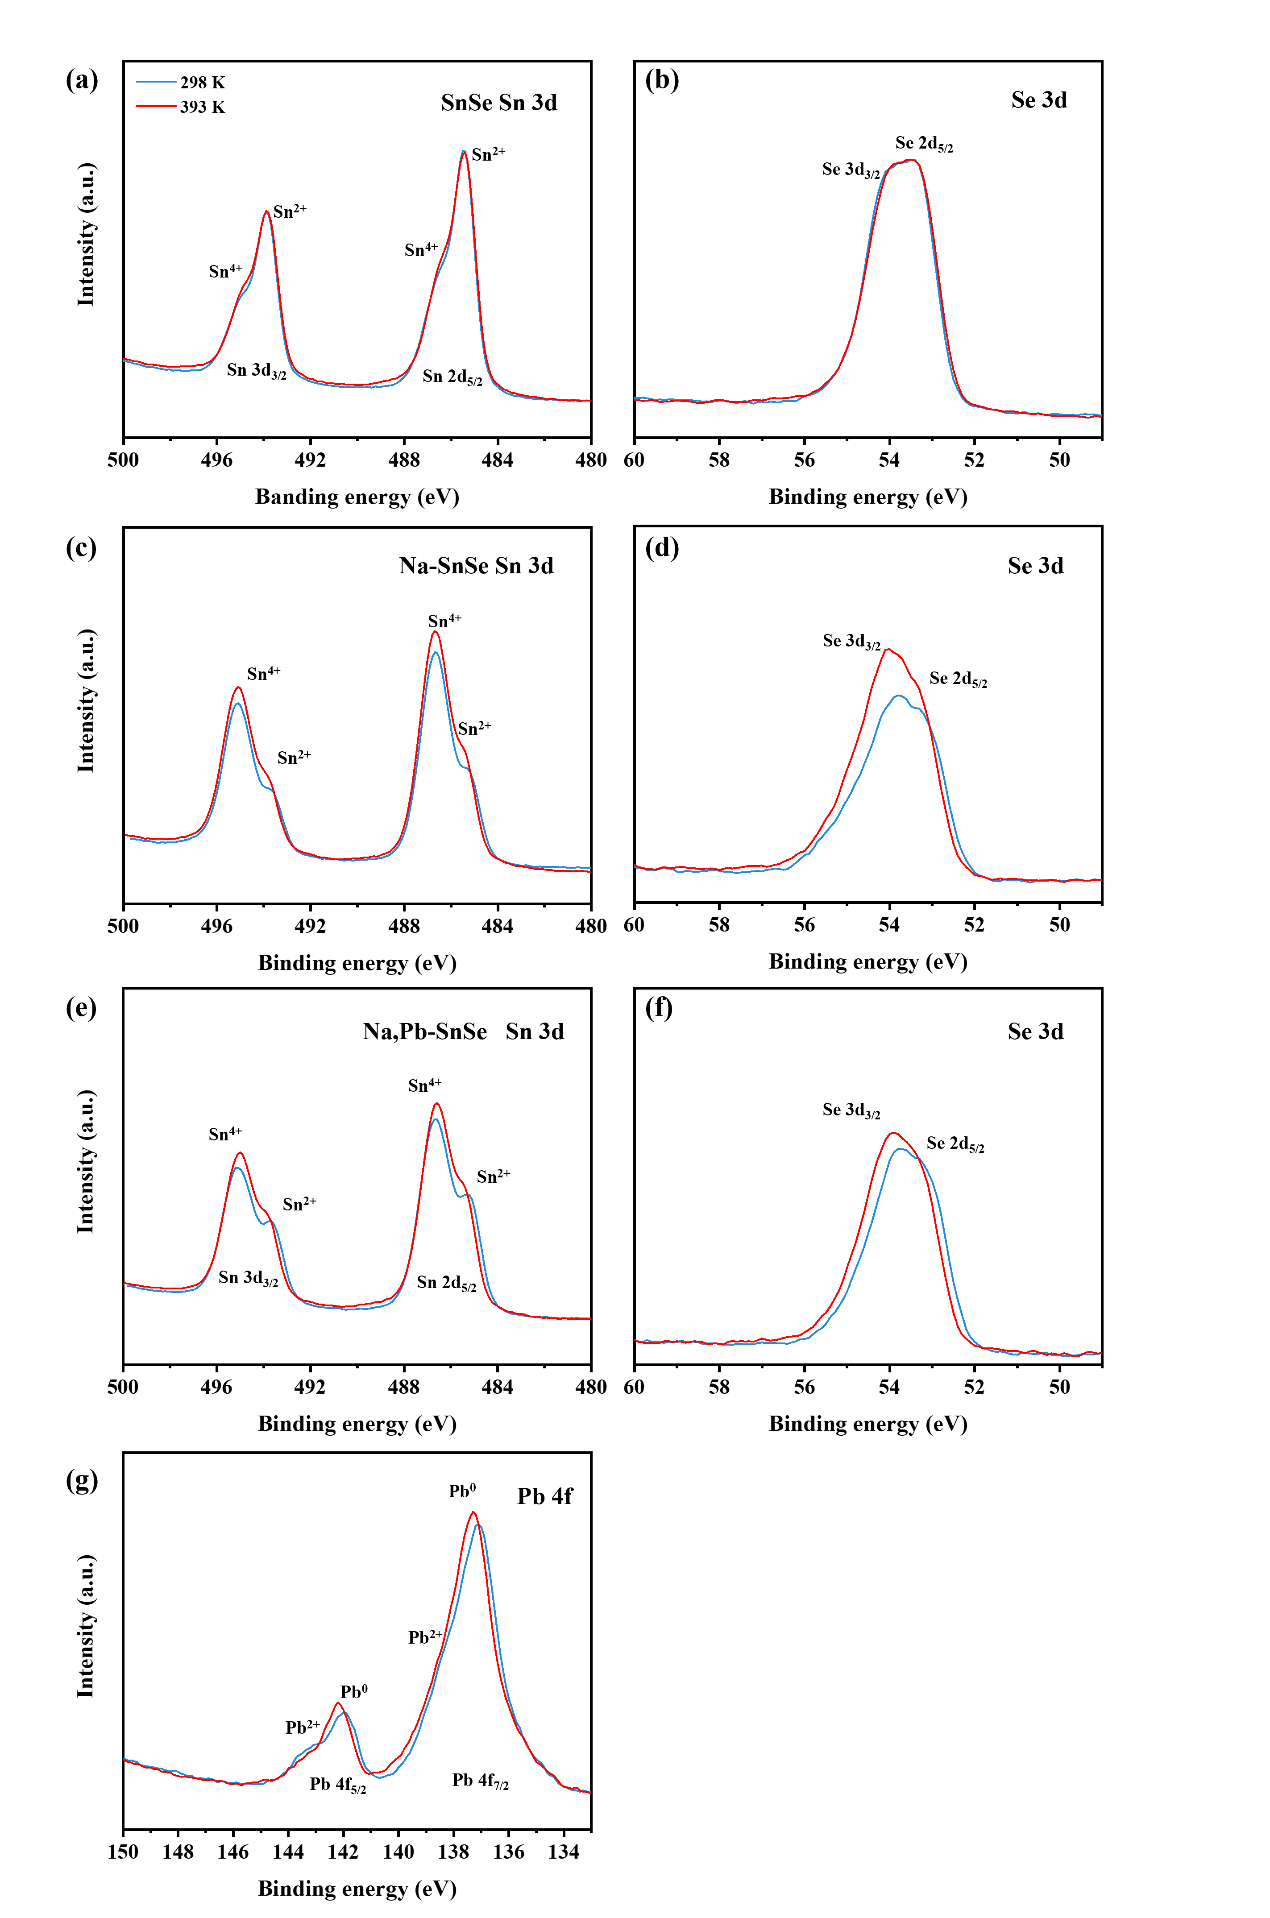


**Supplementary Fig. 11**. High-resolution XPS spectra of (a, b) SnSe, (c, d) Na-SnSe and (e-g) Na,Pb-SnSe nanosheets under different temperatures.


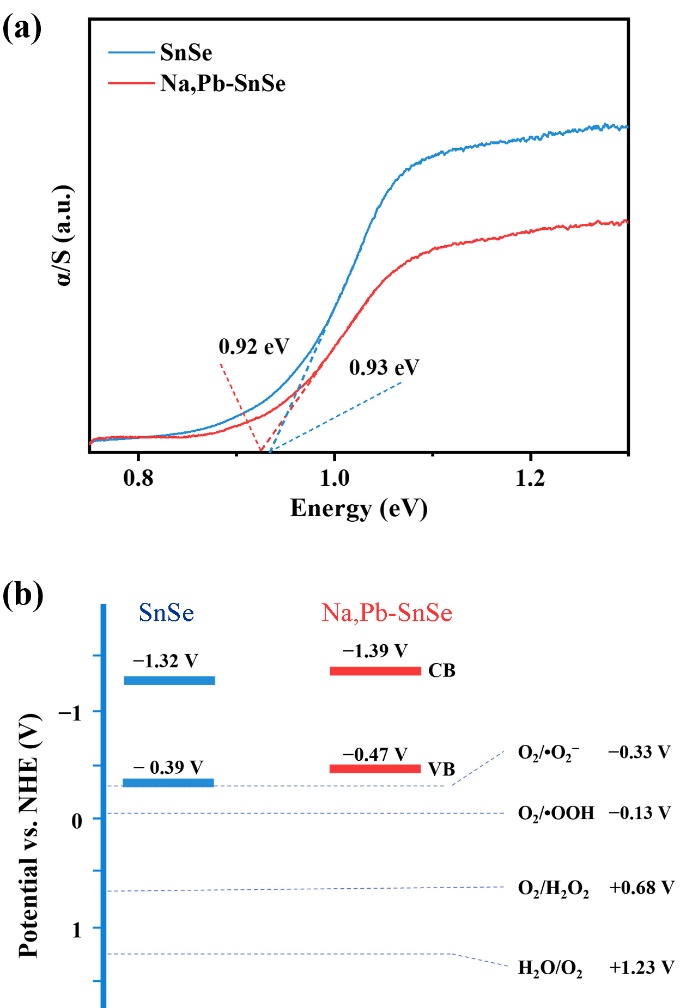


**Supplementary Fig. 12**. (a) Bandgap calculation and (b) schematic band structure of SnSe and Na,Pb-SnSe. The bandgap was achieved by converting reflectance data obtained by UV-Vis DRS to absorption data through the Kubelka-Munk equation: *α*/*S* = (1/2*R*)2/(2*R*), where *R* is the reflectance, and *α* and *S* are the absorption and scattering coefficients, respectively. *E*g is estimated by the Tauc plots. The conversion from vacuum energy (*E*VB-vac) to the potential versus the normal hydrogen electrode (*E*VB-NHE) is achieved through the following relation: *E*VB-NHE = − *E*VB-vac − 4.5.


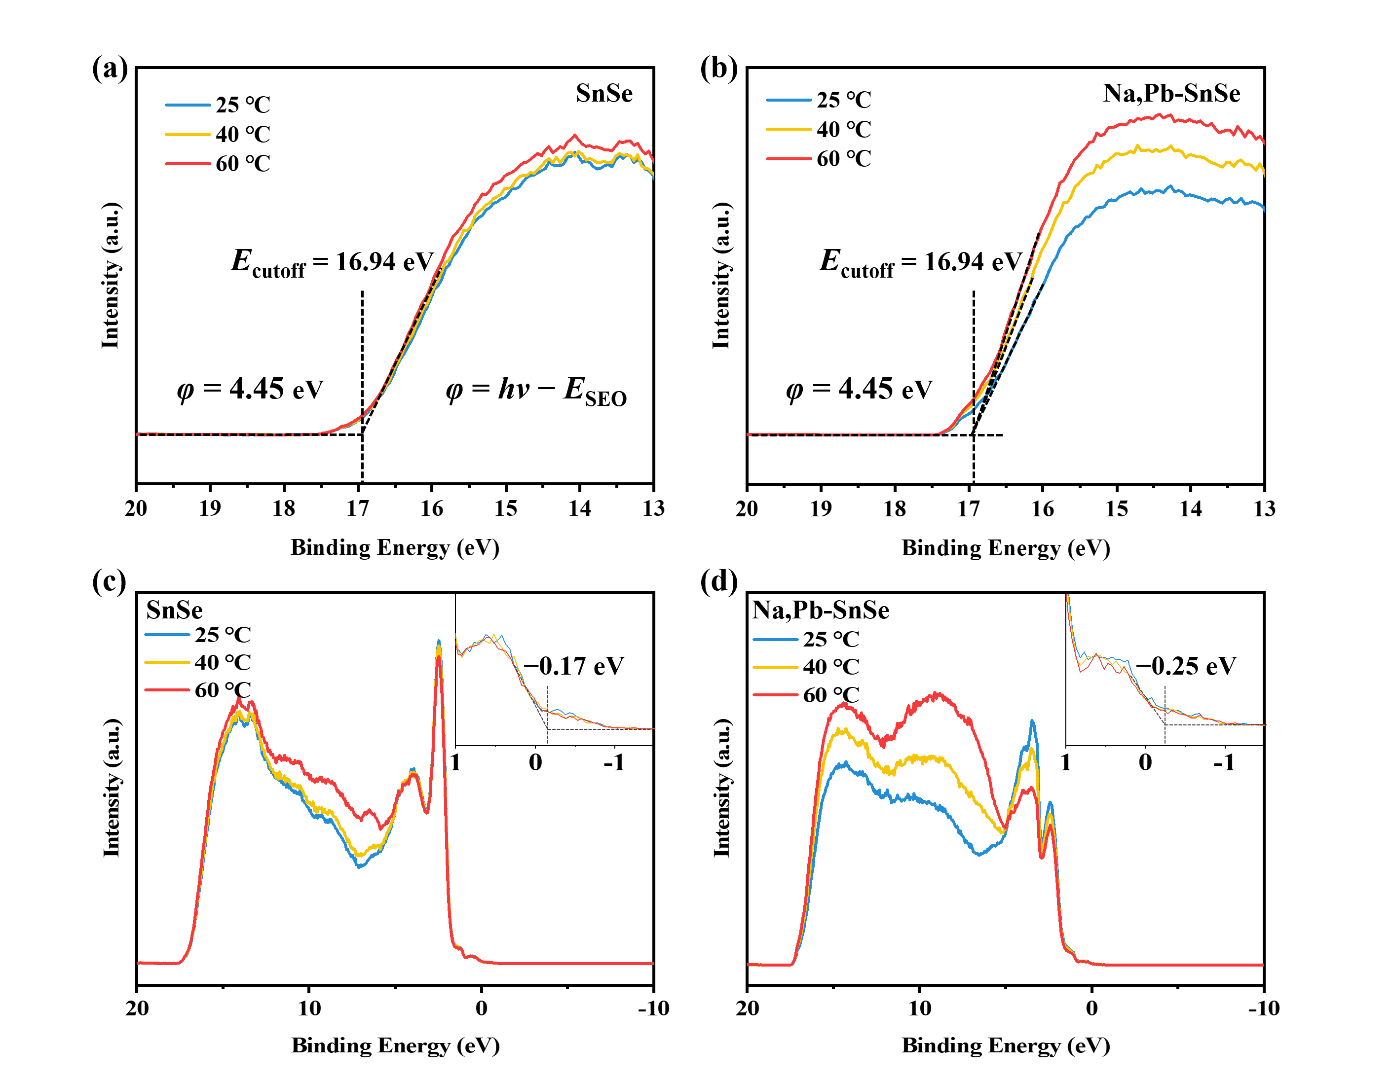


**Supplementary Fig. 13**. UPS spectra of (a, c) SnSe and (b, d) Na,Pb-SnSe under different temperatures. The photon energy *hν* (21.22 eV) corresponds to monochromatic ionizing radiation, whereas *E*cutoff refers to the secondary-electron cutoff derived from the linear extrapolation in UPS spectra. The work function (*φ*) is calculated by the formula: *φ* = *hν* – *E*cutoff. The valence band potential (*E*VB) was determined using the formula: *E*VB = *E*F – *E*VBE.1, 2 Here, *E*f represents the Fermi level (*E*f = –*φ*), and *E*VBE is the valence band edge energy derived from extrapolation of UPS spectrum onsets.


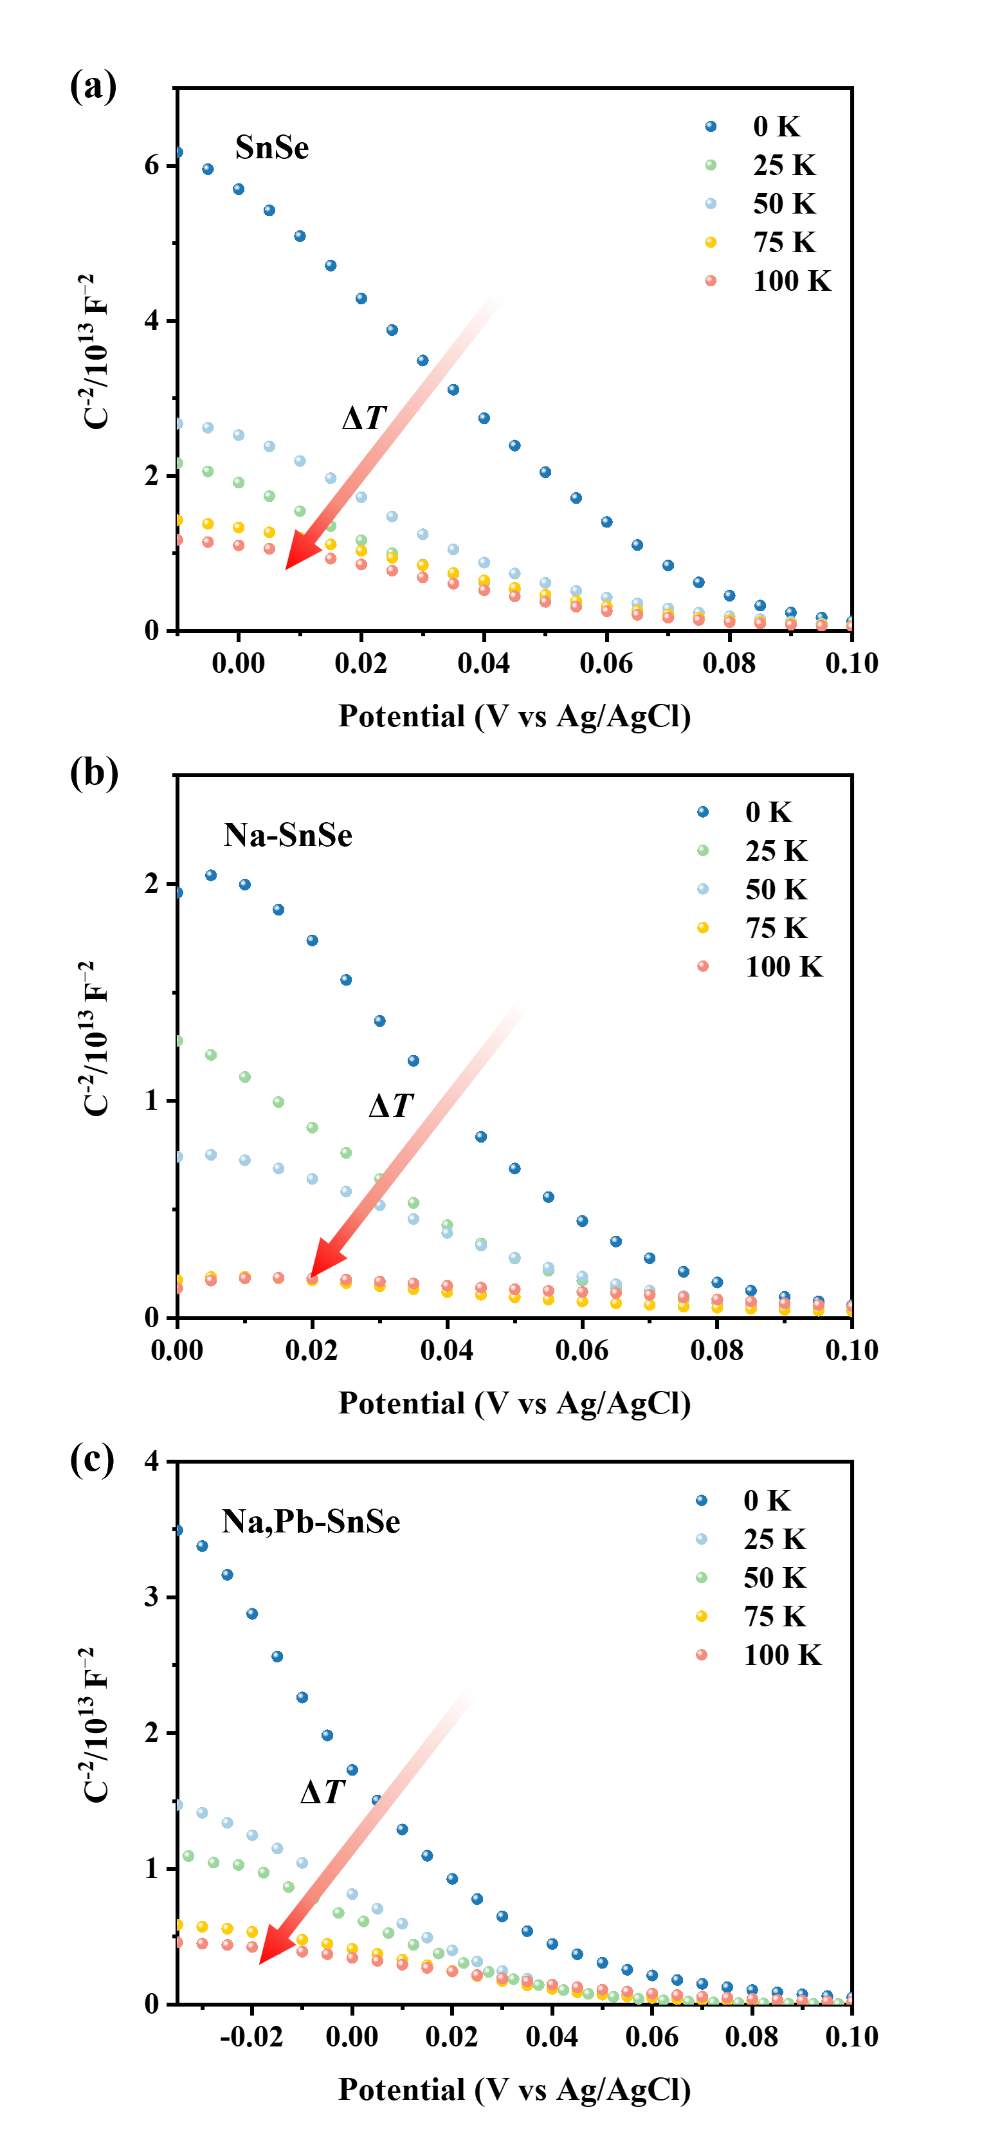


**Supplementary Fig. 14**. Mott-Schottky plots of (a) SnSe, (b) Na-SnSe and (c) Na,Pb-SnSe nanosheets-based electrodes under different Δ*T*.


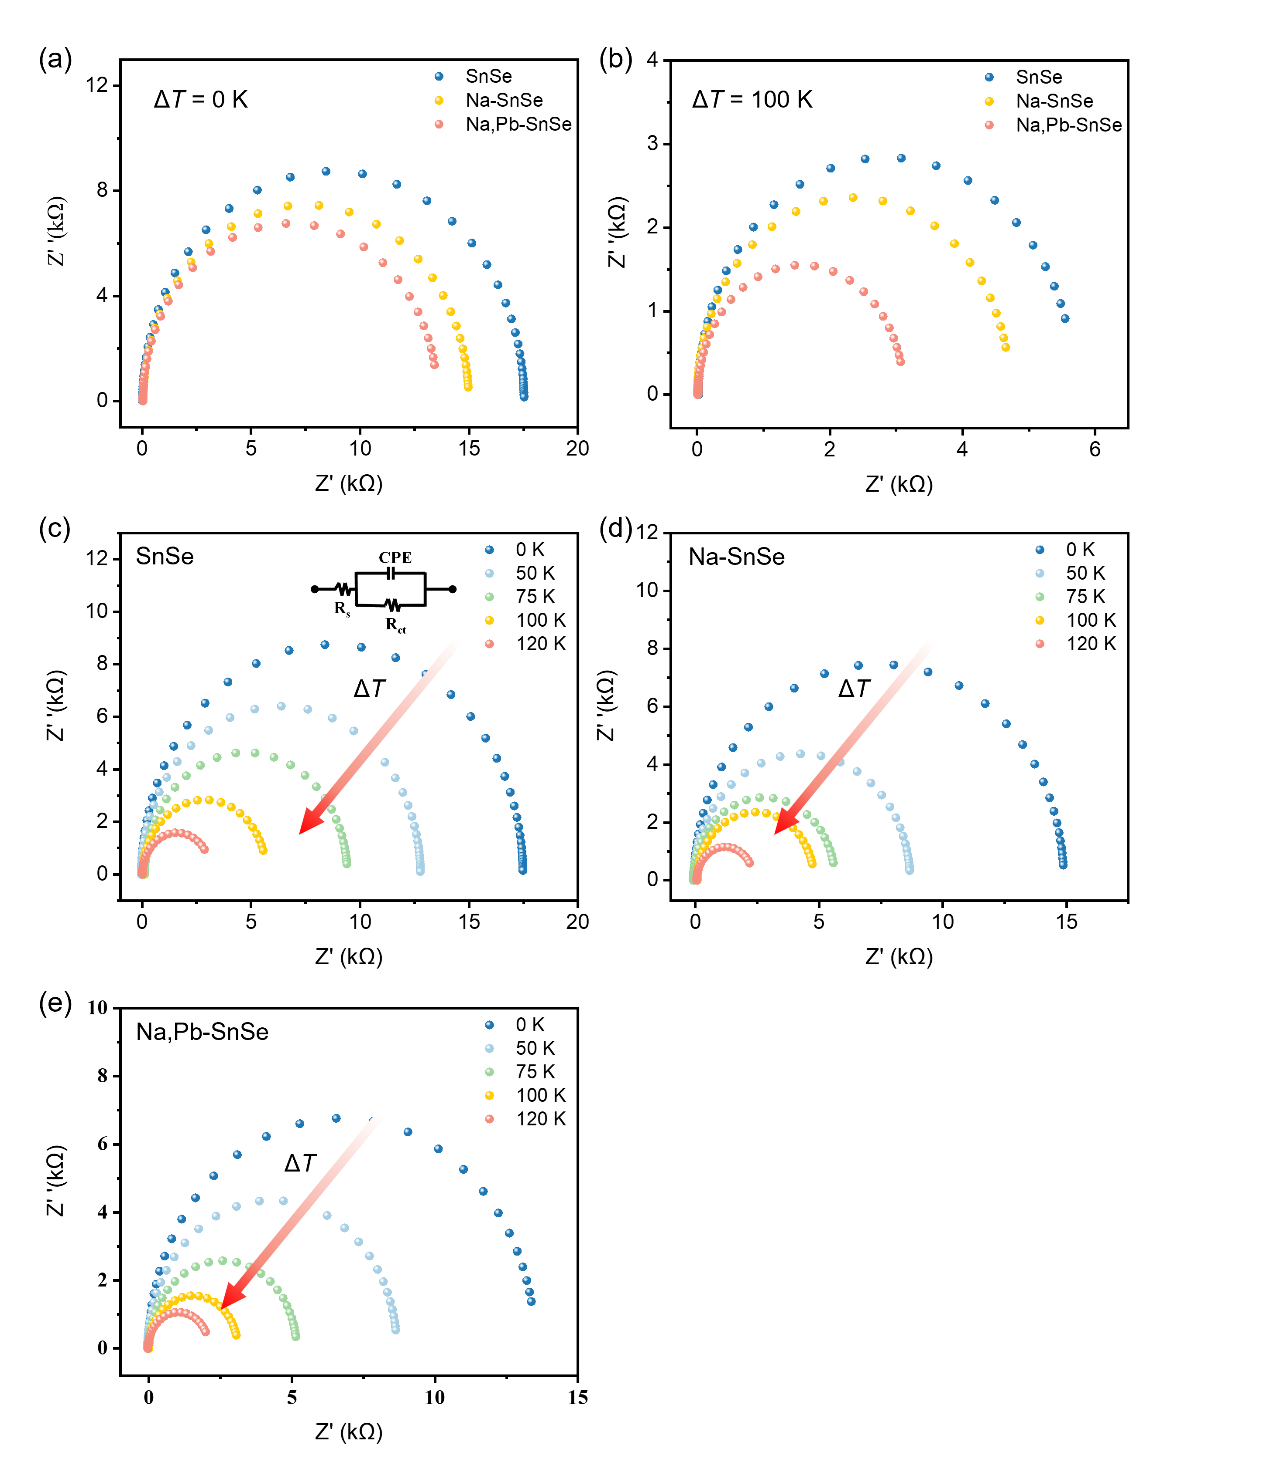


**Supplementary Fig. 15**. EIS Nyquist plots of SnSe, Na-SnSe and Na,Pb-SnSe nanosheets-based electrodes without Δ*T* (a), under the same Δ*T* = 100 K, (b) and under different Δ*T* (c–e).


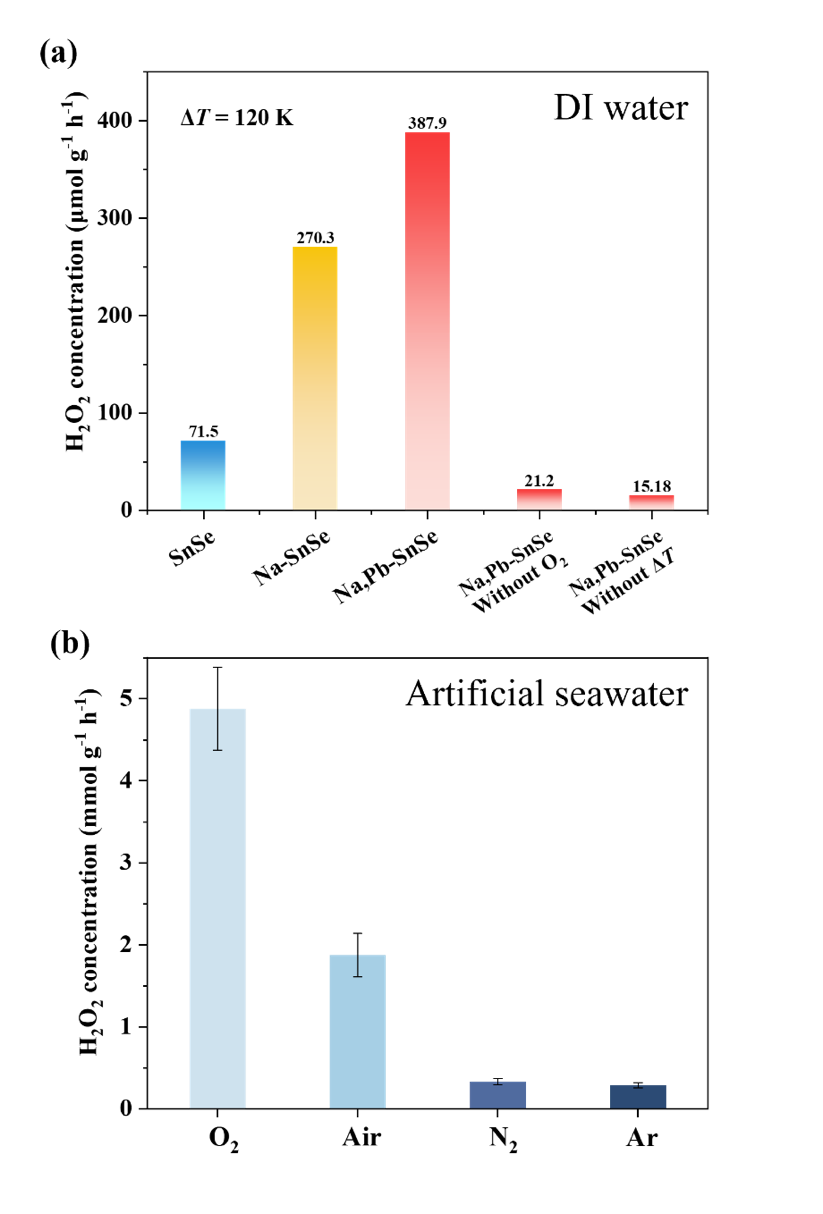


**Supplementary Fig. 16**. (a) Comparison of H2O2 evolution in DI water of different samples under different conditions. (b) Comparison of H2O2 evolution in artificial seawater over Na,Pb-SnSe nanosheets under different atmospheres.


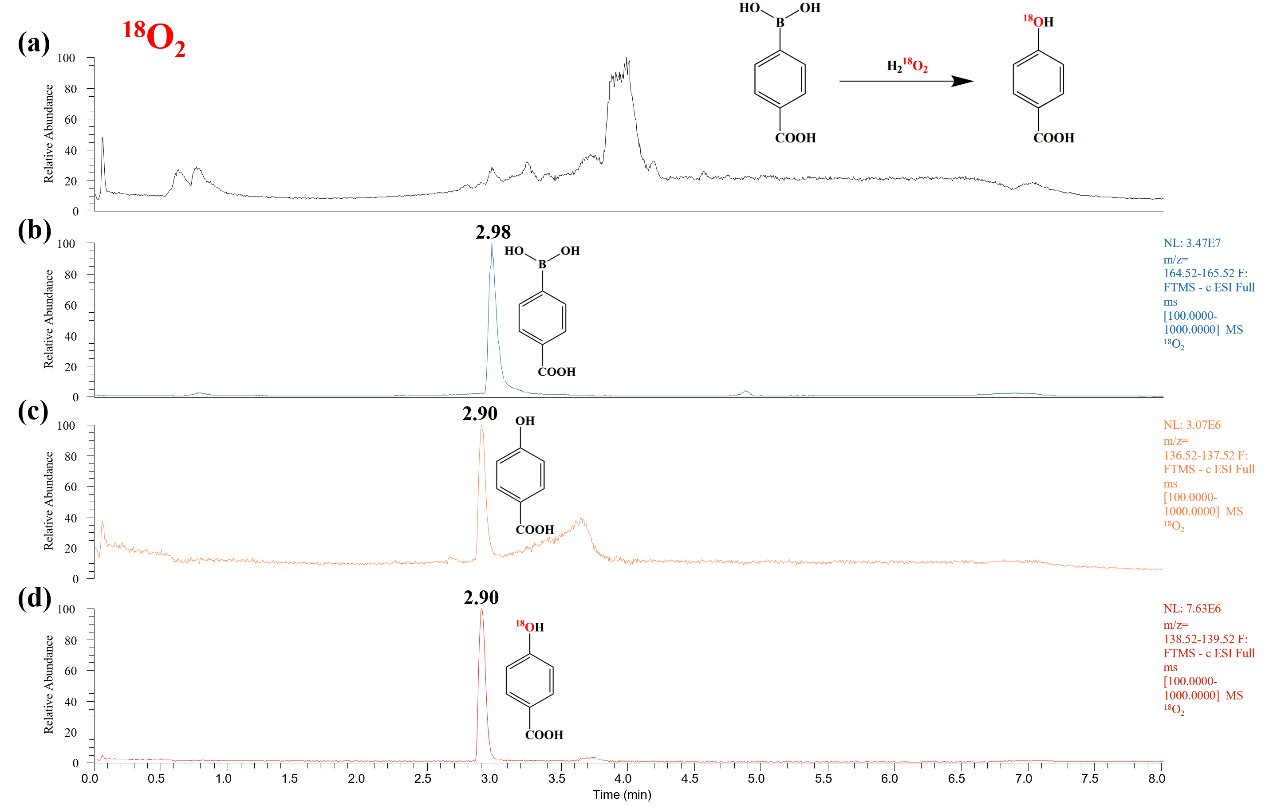


**Supplementary Fig. 17**. Total ion chromatogram (a) and extracted Ion Spectra (b–d) for 18O2 labelled experiment.


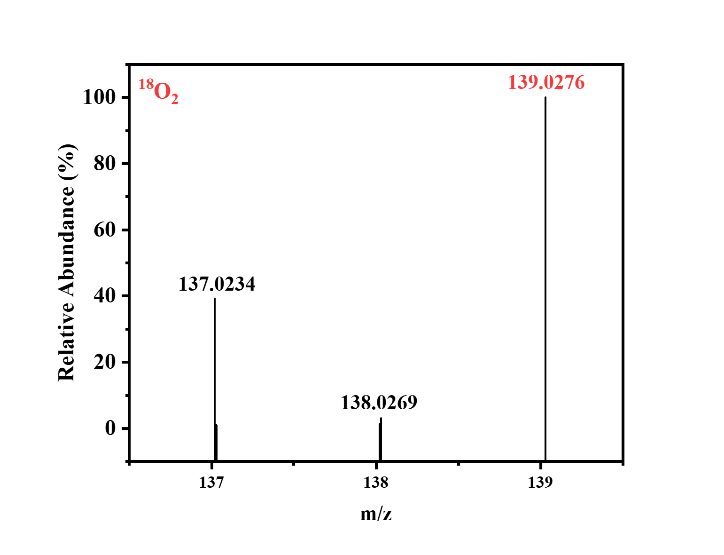


**Supplementary Fig. 18**. LC-MS spectrum of 18O2 labeled experiments.


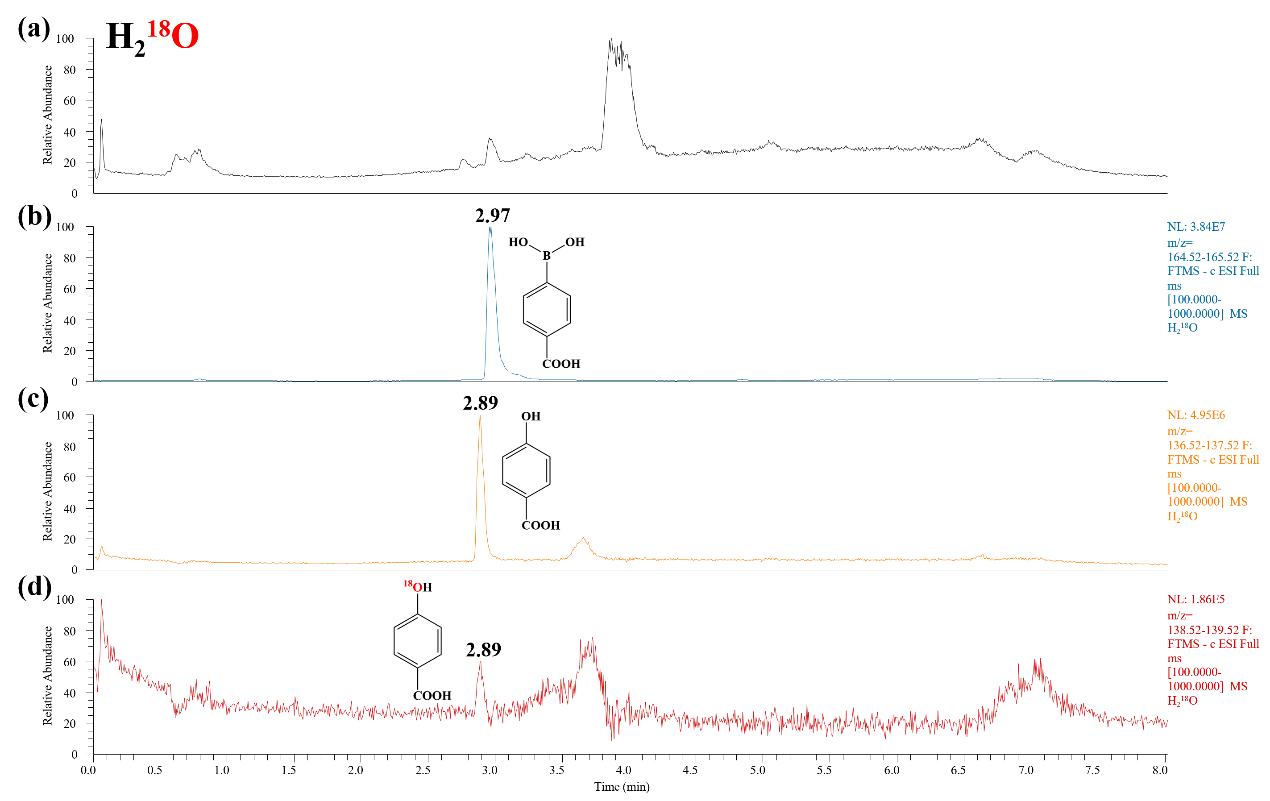


**Supplementary Fig. 19**. Total Ion Chromatogram (a) and extracted Ion Spectra (b–d) for H218O labelled experiment.


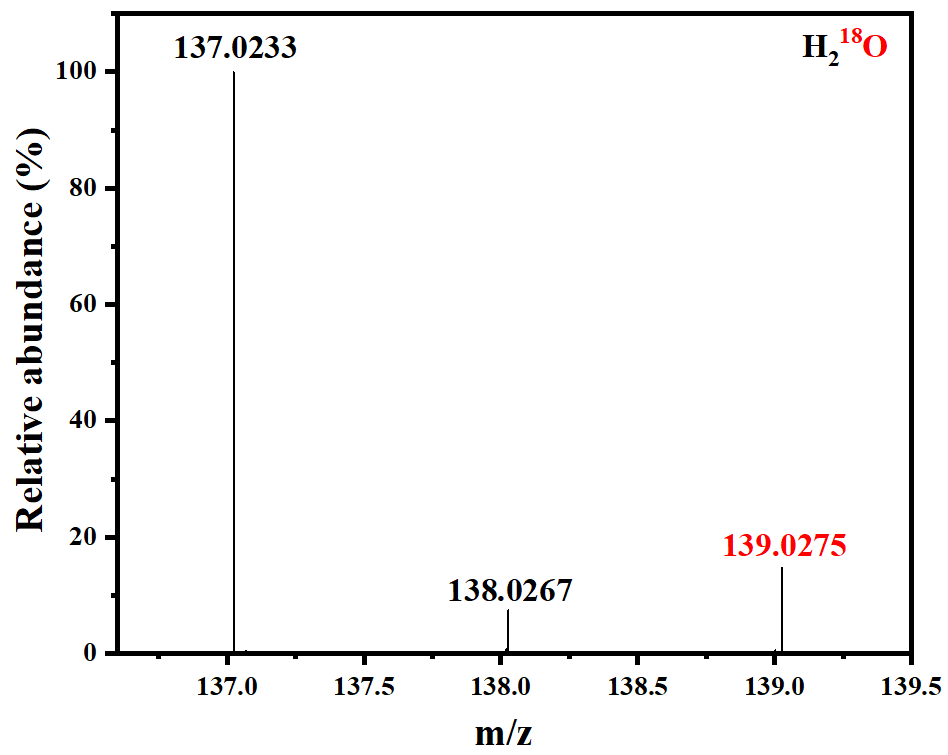


**Supplementary Fig. 20**. Mass spectrum of H218O labeled experiments.


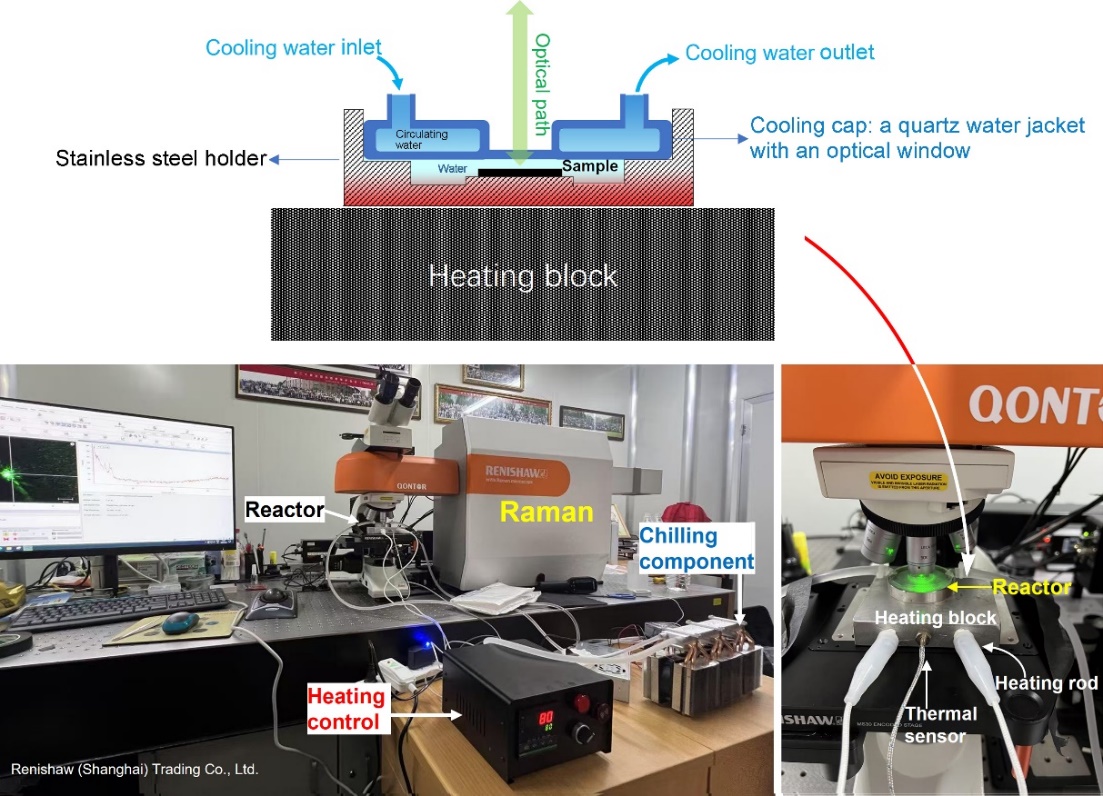


**Supplementary Fig. 21**. Schematic illustration of the experimental setup for *in situ* Raman tests (upper) and photo-images of the home-designed measurement system (lower).


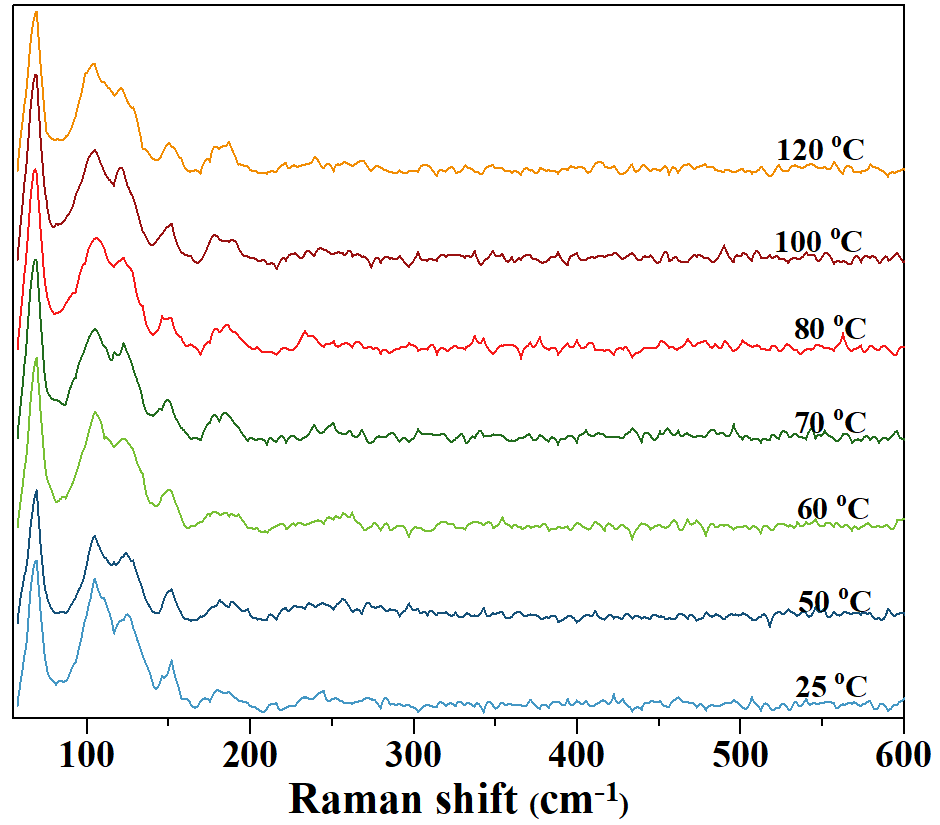


**Supplementary Fig. 22**. *In situ* Raman spectra of Na,Pb-SnSe dry powder catalyst at different temperatures in air.


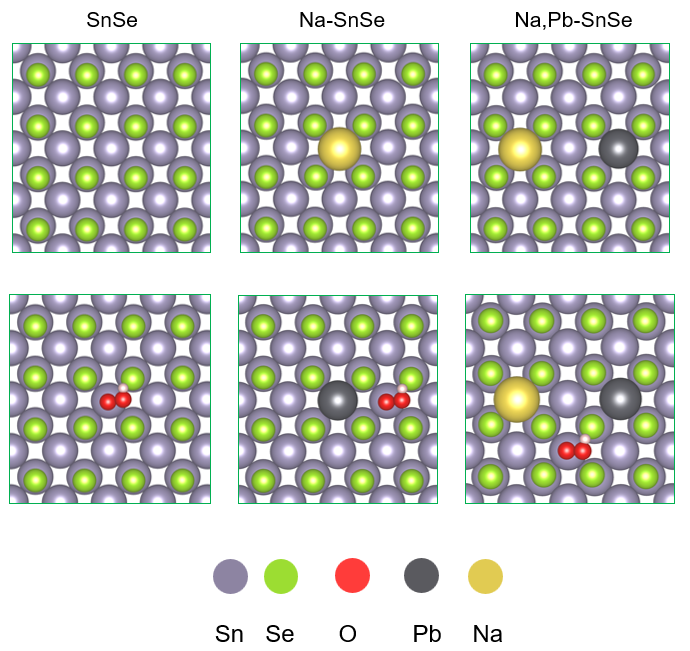


**Supplementary Fig. 23**. Computational models and the most stable OOH adsorption configurations for SnSe, Na-SnSe, and Na,Pb-SnSe, respectively.


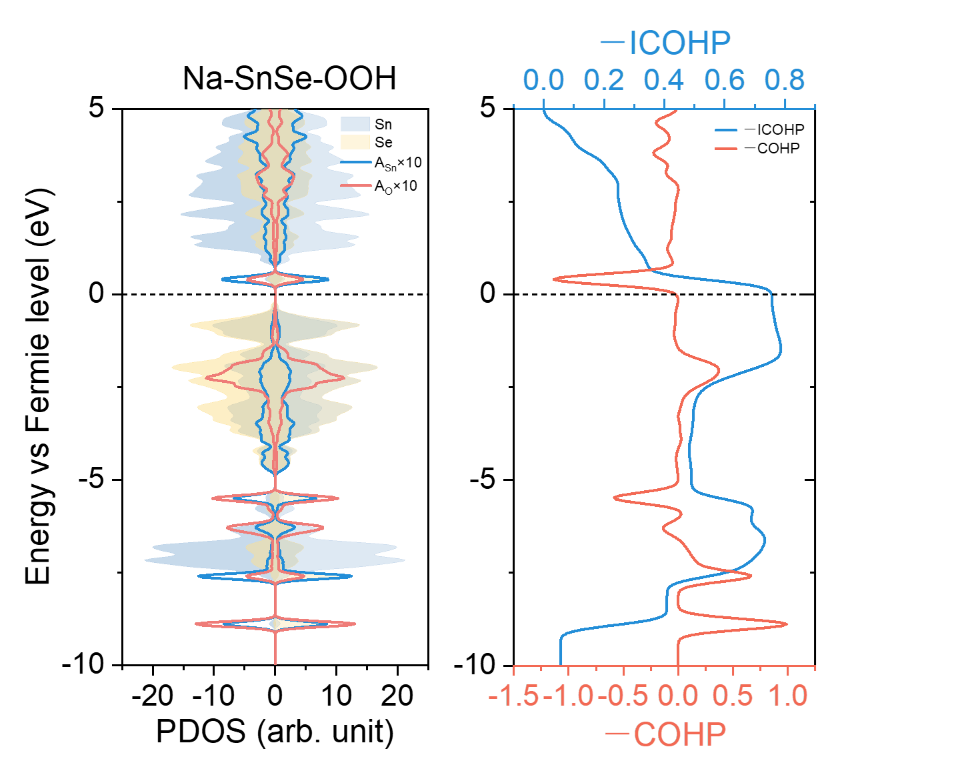


**Supplementary Fig. 24**. PDOS and COHP analysis of the Sn‒OOH interaction on Na-SnSe.


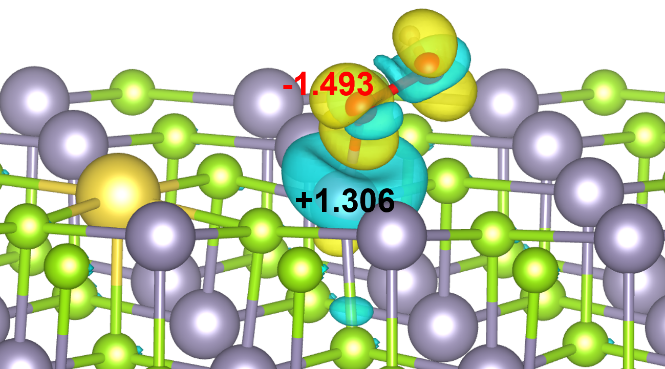


**Supplementary Fig. 25**. Differential charge-density plots of OOH adsorption on Na,Pb-SnSe; yellow and blue regions denote electron accumulation and depletion, respectively.

**
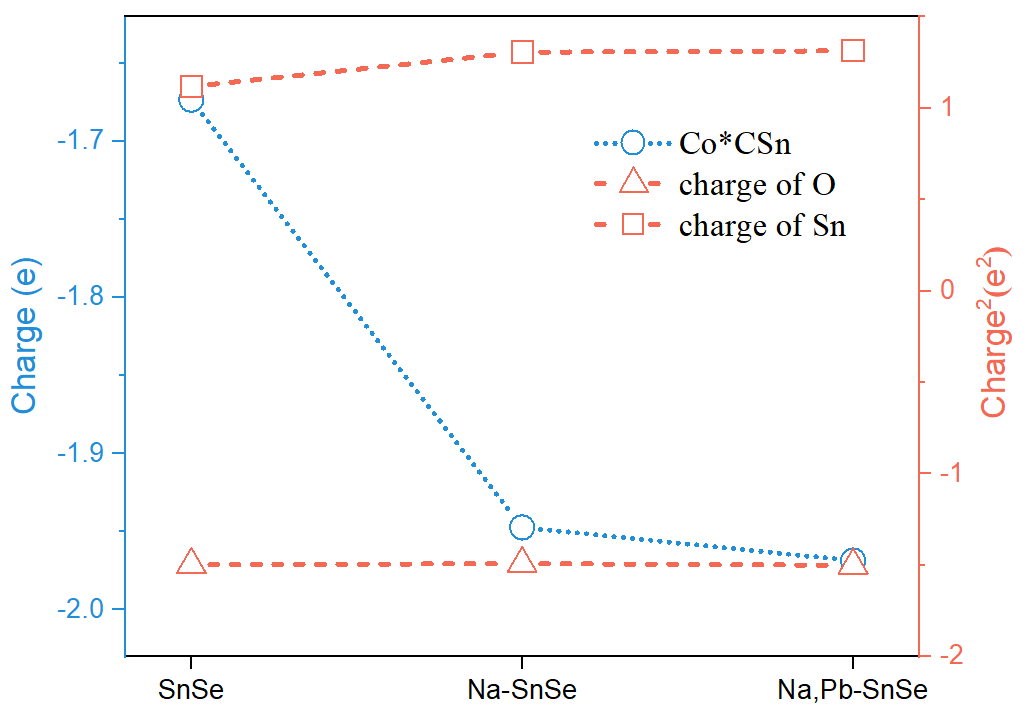
**

**Supplementary Fig. 26**. Bader charge analysis of Sn and O atoms for the O‒OOH bond on SnSe, Na-SnSe and Na,Pb-SnSe.

**Table S1.** Comparison of represented work of photocatalysis and piezocatalysis for H2O2 production.

| **Catalysts** | **Catalytic**  **conditions** | **H2O2 evolution rates (mmol·g−1·h−1)** | **Refs.** |
| --- | --- | --- | --- |
| Co-N@G | Sunlight | 0.35 | ***Nat. Commun.*** 2023, 14, 2493 |
| ZnIn2S4 nanosheets | Visible-light | 1.7 | ***J. Am. Chem. Soc.*** 2023, 145, 27757 |
| COTh-PAFs | Visible-light | 3.9 | ***Angew. Chem. Int. Ed.*** 2024, 63, e202402095 |
| CN-PDA | Visible-light | 0.74 | ***Angew. Chem. Int. Ed.*** 2024, 63. e202319216 |
| DPT-MOF | Visible-light | 1.7 | ***J. Am. Chem. Soc.*** 2024, 146, 11319 |
| COF-S-OH | Visible-light | 10.2 | ***Angew. Chem. Int. Ed.*** 2025, 64, e202511024 |
| COF/MoS2 | Visible-light | 8.2 | ***Angew. Chem. Int. Ed.*** 2025, 64, e202505491 |
| COF-TPT-Azo | Visible-light | 1.5 | ***Angew. Chem. Int. Ed.*** 2024, 63, e202409250 |
| BTT-H3 COF | *λ* = 467 nm | 1.6 | ***Nat. Commun.*** 2025, 16, 503 |
| DBS-C/Z | Visible-light | 1.42 | ***Angew. Chem. Int. Ed.*** 2025, e202508226 |
| PBCPs | Visible-light | 2.6 | ***Angew. Chem. Int. Ed.*** 2025, 64, e202425054 |
| Si-CDs | Visible-light | 1.4 | ***Angew. Chem. Int. Ed.*** 2025, 64, e202509790 |
| TpAP | Visible-light | 2.3 | ***J. Am. Chem. Soc.***2025, 147, 16, 13618 |
| DT2TA-TAPB | Visible-light | 8.6 | ***Nat. Commun.*** 2025, 16, 5658 |
| Au/Cu-Zn3In2S6 | UV-vis light | 5.7 | ***Adv. Mater.*** 2025, 37, e11422 |
| O-Ru-ZIS | *λ* = 350-780 nm | 3.7 | ***Adv. Mater.*** 2025, 37, e09867 |
| CTN | Ultrasonication 100 W/40 kHz | 4.1 | ***Angew. Chem. Int. Ed.*** 2025, 64, e202419867 |
| CQDs-C3N5 | Ultrasonication 100 W/40 kHz | 5.0 | ***Angew. Chem. Int. Ed.*** 2025, 64, e202502390 |
| Sn0.9Se nanosheets | 40 ℃, pure water | 2.6 | ***Nat. Catal.*** 2025, 8, 465 |
| **Na,Pb-SnSe** | **Δ*T* = 120 K seawater** | **6.1** | **This work** |

**Table S2.** Comparison of H2O2 production activity from seawater with previously reported representative work.

| **Catalysts** | **Catalytic**  **conditions** | **H2O2 evolution rates in seawater (mmol·g−1·h−1)** | **H2O2 evolution rates in DI water (mmol·g−1·h−1)** | **Refs.** |
| --- | --- | --- | --- | --- |
| PM-CDs | Visible light | 1.8 | 1.3 | ***Nat. Commun.*** 2021, 12, 483 |
| TD-COF | White LED light (400-700 nm) | 3.4 | 4.1 | ***Angew. Chem. Int. Ed.*** 2023, 62, e202309624 |
| TB-COF | White LED light (400-700 nm) | 4.1 | 5.2 | ***ACS Catal.*** 2024, 14, 4728 |
| 3D COFs | Visible light | 6.9 | 7.9 | ***Adv. Funct. Mater.*** 2024, 34, 2411077 |
| ECUT-COF | Xenon lamp light | 2.4 | 3.4 | ***Nano Lett.*** 2024, 24, 3819 |
| TBA-COF | Visible light | 8.9 | 3.9 | ***Adv. Funct. Mater.*** 35, 2025, 2421514 |
| UP-TP | Visible light | 3.8 | 2.1 | ***Adv. Funct. Mater.*** 35, 2025, 2414755 |
| BiOBr | Ultrasonication 110 W/37 kHz | 0.23 | 0.46 | ***Adv. Funct. Mater.*** 2024, 34, 2411464 |
| Bi2O2(OH)(NO3) | Ultrasonication 300 W/40 kHz | 0.20 | 0.97 | ***Adv. Mater.*** 2025, 37, 2505592 |
| **Na,Pb-SnSe** | **Δ*T* = 120 ℃** | **6.1** | **0.39** | **This work** |

**References:**

(1) Su, B.; Zheng, M.; Lin, W.; Lu, X. F.; Luan, D.; Wang, S.; Lou, X. W. S-scheme Co9S8@Cd0.8Zn0.2S-DETA hierarchical nanocages bearing organic CO2 activators for photocatalytic syngas production. *Adv. Energy Mater.* **2023**, *13* (15), 2203290. DOI: <https://doi.org/10.1002/aenm.202203290>.

(2) Braun, S.; Salaneck, W. R.; Fahlman, M. Energy-Level Alignment at Organic/Metal and Organic/Organic Interfaces. *Adv. Mater.* **2009**, *21* (14-15), 1450-1472. DOI: <https://doi.org/10.1002/adma.200802893>.
